# Supplementary material for: A-site FA+engineering boosting photoluminescence efficiency and stability of cesium copper iodine (Cs3Cu2I5) perovskites
Source: Royal Society of Chemistry journal article supplement (doi:10.1039/d2tc04057c), 2022-12-09
Supplement: d2tc04057c1.pdf [file d2tc04057c1.pdf]

## Supporting Information

# A-site FA<sup>+</sup> Engineering Boosting Photoluminescence Efficiency and Stability of Cesium Copper Iodine (Cs<sub>3</sub>Cu<sub>2</sub>I<sub>5</sub>) Perovskites

*Wenxuan Fan,<sup>a</sup> Leimeng Xu,<sup>b</sup> Zhi Yang,<sup>\*b</sup> Yingliang Liu<sup>\*a</sup> and Jizhong Song,<sup>\*b</sup>*

<sup>a</sup> School of Materials Science and Engineering, Zhengzhou University, Daxue Road 75, Zhengzhou 450052, China.

<sup>b</sup> Key Laboratory of Materials Physics of Ministry of Education, School of Physics and Microelectronics, Zhengzhou University, Daxue Road 75, Zhengzhou 450052, China.

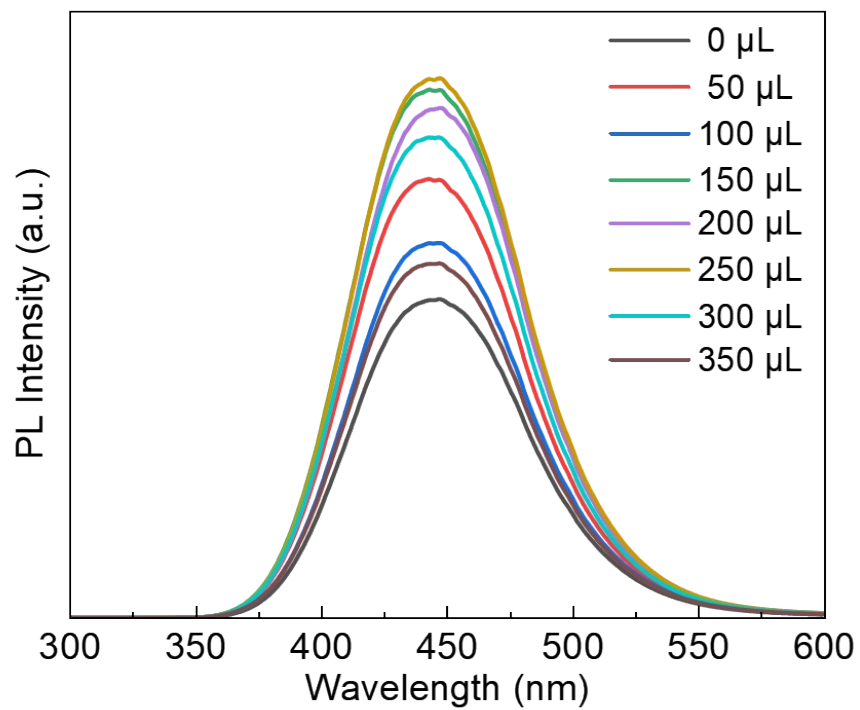

**Figure. S1** PL spectra of  $\text{Cs}_3\text{Cu}_2\text{I}_5$  samples treated by different quantities of OA.

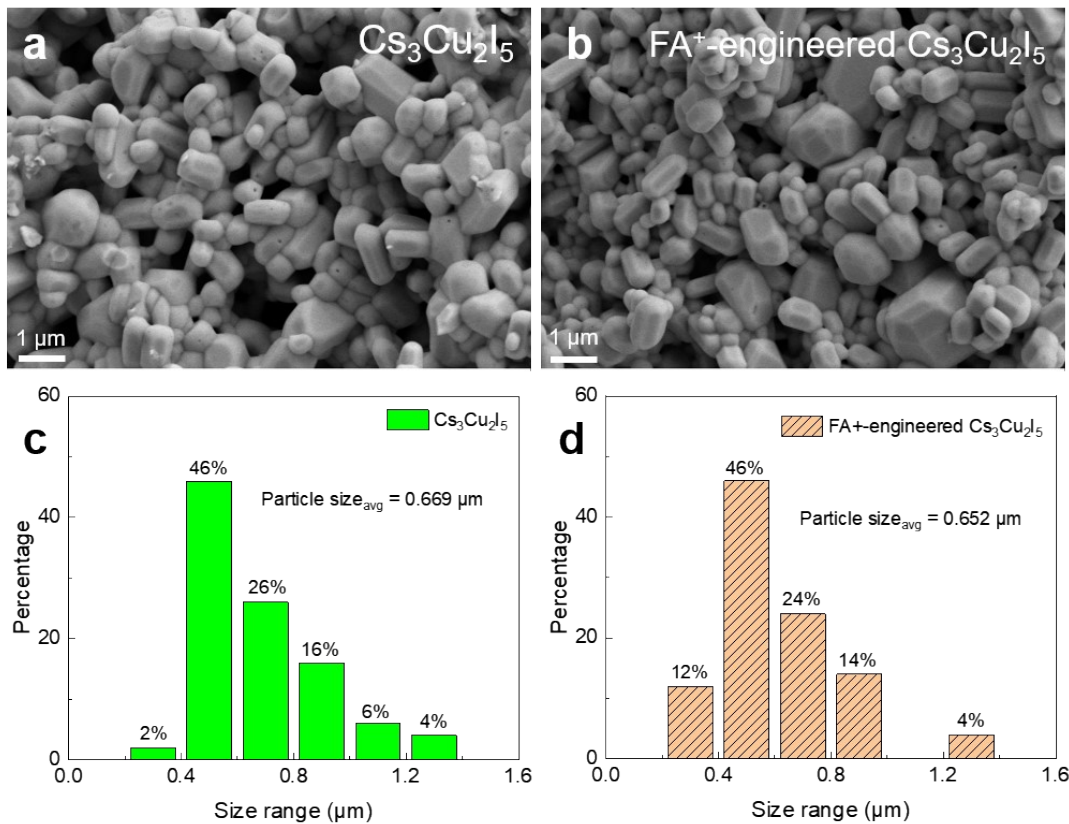

**Figure S2.** The SEM images of pure and FA<sup>+</sup>-engineered  $\text{Cs}_3\text{Cu}_2\text{I}_5$  (a-b) and particle size distribution histograms (c-d).

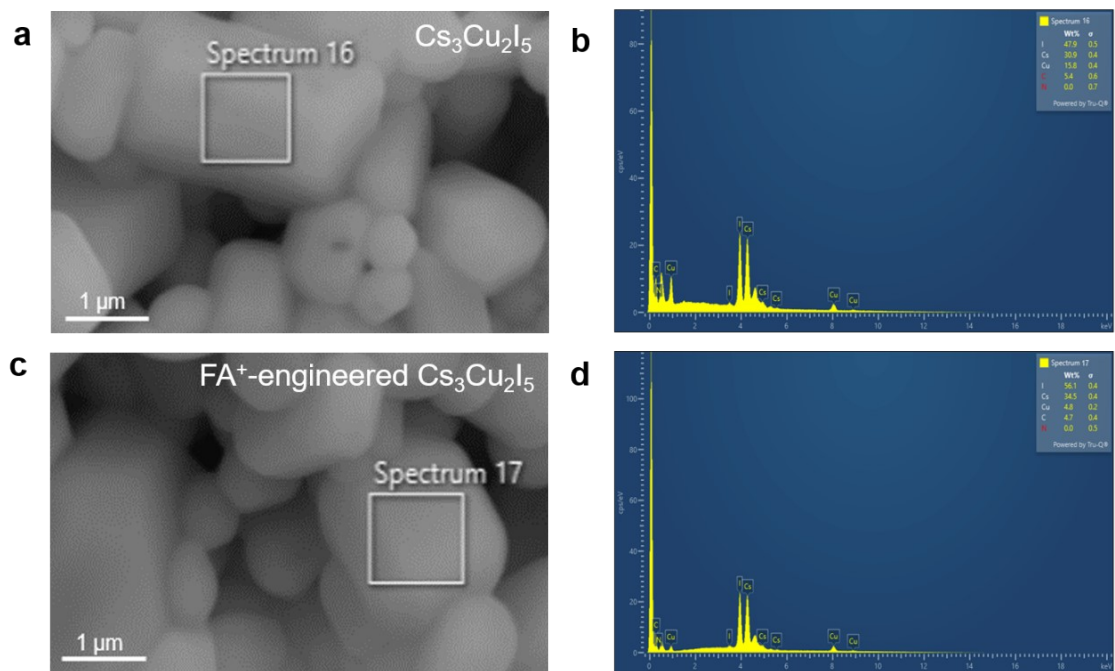

**Figure. S3** The EDS spectrum of  $\text{Cs}_3\text{Cu}_2\text{I}_5$  (a) and 5% FA<sup>+</sup>-engineered  $\text{Cs}_3\text{Cu}_2\text{I}_5$  (b).

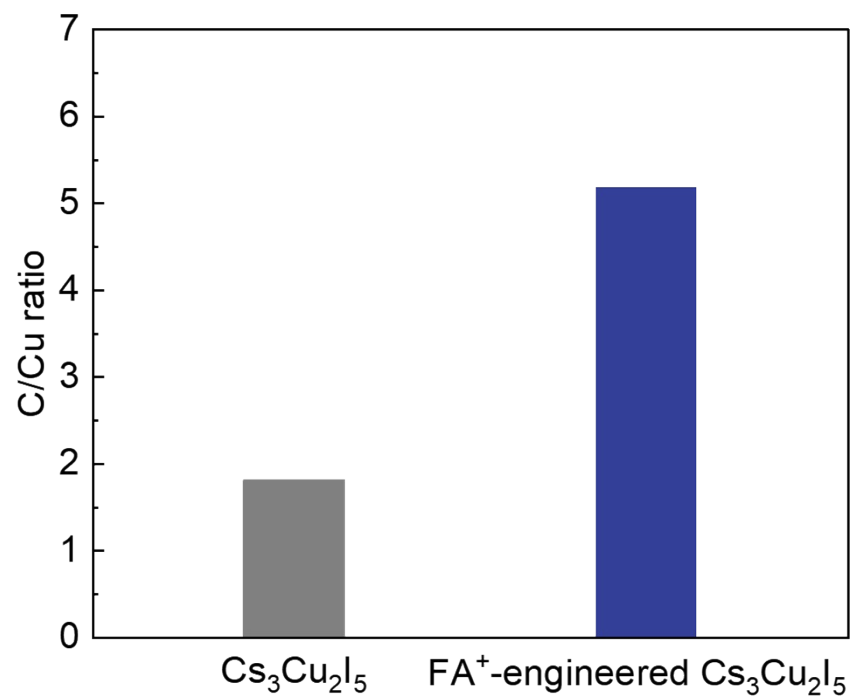

**Figure. S4** The C/Cu ration of Cs<sub>3</sub>Cu<sub>2</sub>I<sub>5</sub> and 5% FA<sup>+</sup>-engineered Cs<sub>3</sub>Cu<sub>2</sub>I<sub>5</sub> obtained from EDS result.

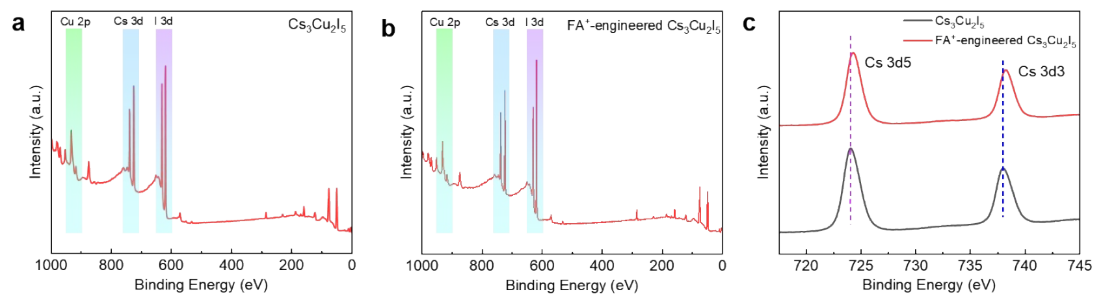

**Figure. S5** X-ray photoelectron spectra (XPS) of (a)  $\text{Cs}_3\text{Cu}_2\text{I}_5$ , (b) 5%  $\text{FA}^+$ -engineered  $\text{Cs}_3\text{Cu}_2\text{I}_5$ , (c) Cs 3d.

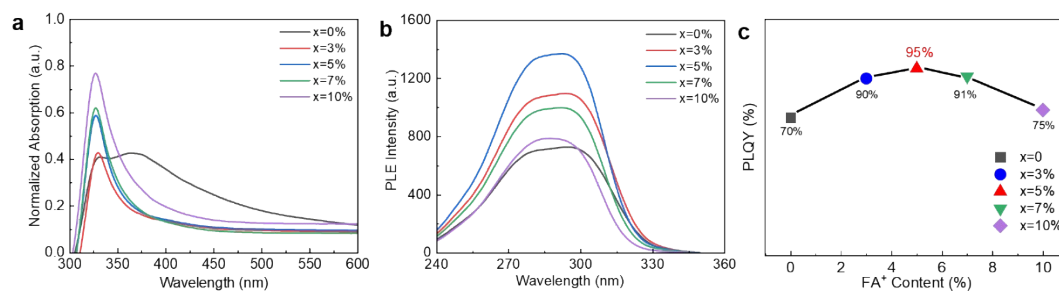

**Figure. S6** The Normalized Absorption spectra (a) and PLE spectra (b) of Cs<sub>3</sub>Cu<sub>2</sub>I<sub>5</sub> with different FA<sup>+</sup> content. (c) PLQY of pure and different proportions FA<sup>+</sup>-engineered Cs<sub>3</sub>Cu<sub>2</sub>I<sub>5</sub> samples.

The PLQY was tested by integrating sphere method. The excitation wavelength is 290 nm (Scatter Range: 279 to 302 nm and Emission Range: 306 to 803 nm). The PLQY can be calculated from the equation:

$$\Phi = \frac{E_c - E_a}{L_a - L_c}$$

$\Phi$  is the absolute PLQY;  $E_c$  and  $L_c$  are the fluorescence emission and the scatter of the sample and  $L_a$  and  $E_a$  are also the emission and scatter of a blank.

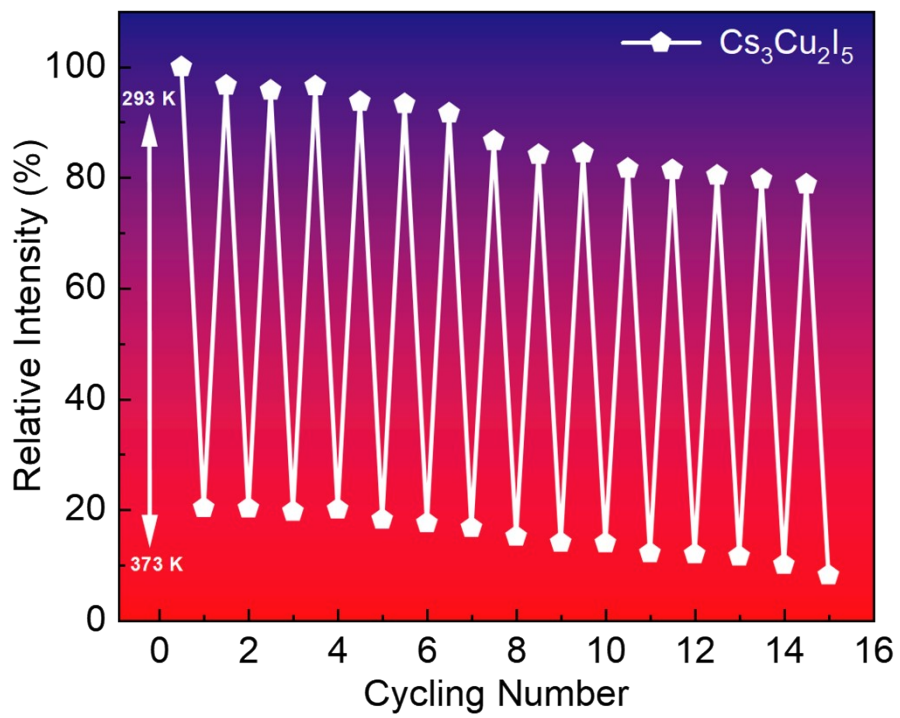

**Figure. S7** Heat-cooling cycles stability test of pure Cs<sub>3</sub>Cu<sub>2</sub>I<sub>5</sub> powder.



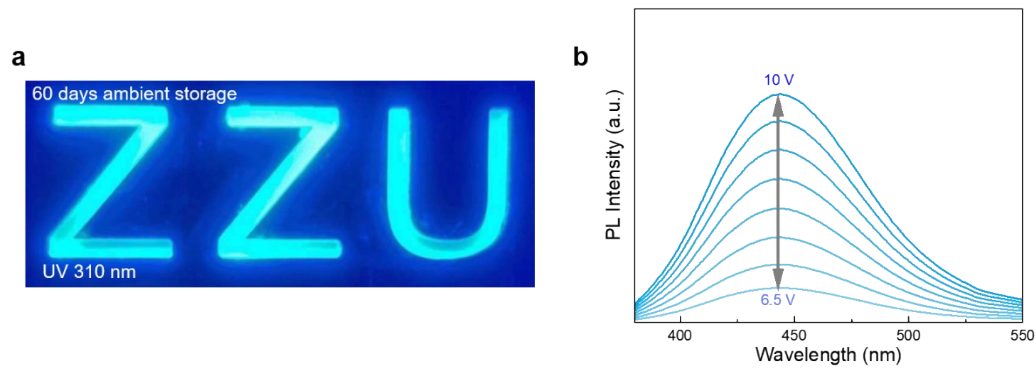

**Figure. S8** (a) The picture of 5% FA<sup>+</sup>-engineered Cs<sub>3</sub>Cu<sub>2</sub>I<sub>5</sub> powder in polydimethylsiloxane (PDMS) gel after 60 days ambient storage under UV light (310 nm). (b) The PL spectra of 5% FA<sup>+</sup>-engineered Cs<sub>3</sub>Cu<sub>2</sub>I<sub>5</sub>-LED device under different driving voltage.

**Table S1.** Time-resolved PL decay curves of the pure and different proportions FA<sup>+</sup>-engineered Cs<sub>3</sub>Cu<sub>2</sub>I<sub>5</sub> samples.

| FA (%) | A <sub>1</sub> | τ <sub>1</sub> (ns) | A <sub>2</sub> | τ <sub>2</sub> (ns) | T <sub>avg</sub> (ns) |
|--------|----------------|---------------------|----------------|---------------------|-----------------------|
| 0      | 462            | 414                 | 2528           | 1109                | 1064                  |
| 3      | 341            | 361                 | 2619           | 1123                | 1092                  |
| 5      | 500            | 658                 | 2416           | 1229                | 1172                  |
| 7      | 617            | 963                 | 2298           | 1162                | 1126                  |
| 10     | 602            | 608                 | 2416           | 1169                | 1104                  |

The decay curves of the pure and FA<sup>+</sup>-engineered Cs<sub>3</sub>Cu<sub>2</sub>I<sub>5</sub> sample which collected at the emission wavelength of 443 nm were fitted by a double exponential attenuation equation:  $I(t) = A_1 \exp(-t/\tau_1) + A_2 \exp(-t/\tau_2)$ . The correlation index of the fitted curve is 0.9990, 0.9987, respectively.

The average PL lifetime is calculated by a weighted averaging equation:

$$\tau_{\text{avg}} = (A_1\tau_1^2 + A_2\tau_2^2) / (A_1\tau_1 + A_2\tau_2).$$

τ<sub>1</sub> and τ<sub>2</sub> are time constants representing radiative and non-radiative transition process respectively; A<sub>1</sub> and A<sub>2</sub> are corresponding weight factor for the τ<sub>1</sub> and τ<sub>2</sub> respectively.
